# Supplementary material for: The relationship between the living environment and remote working: an analysis using the SHEL model
Source: PeerJ. 2024 May 7;12:e17301. doi: 10.7717/peerj.17301 (PMC11086296; doi:10.7717/peerj.17301)
Supplement: Supplemental Information 1 [file peerj-12-17301-s001.xlsx]

## Sheet: Sheet2
ＩＤ	Age	Gender (1=Male)	Job (0=Managerial position)	Overall satisfaction	Satisfaction with the physical environment	Perceived productivity	Work engagement	Stress reactions	Job autonomy	Qualitative workload	Quantitative workload	Brightness of workroom	Ambient noise	Size of workroom	Dedicated desk	Size of desk	Dedicated chair	Chair: armrests	Chair: adjustment	Internet speed	PC performance	External monitor	Size of PC monitor	External speaker	External microphone	Headset	Dedicated workspace	Workspace is within the space they use for housework and daily life	Space for eating and resting	Living with partner	Living with preschooler	Living with elementary school students	Living with junior high school students or older	Living with children who have completed their studies	Living with parents	Frequency of being in the same room with housemates	Frequency of intervention by housemates	Degree of housework sharing with housemates	Regularly breaks	Regularly meals	Frequency of interrupted work for household tasks	Time spent on household tasks	Regularly worktime	Frequency of thinking about work after work hours	Frequency of overtime working	Frequency of looking at a PC for work on days off	Number of telecommuting days per week	Number of online meetings per week	Online meeting hours per day
m89789605222	37	1	0	1	1	9	11	65	8	7	7	3	3	2	0	2	1	1	1	2	2	1	1	1	1	1	1	1	1	0	0	0	1	0	0	2	1	3	3	3	2	2	3	2	2	2	2	3	3
m896165573	39	0	1	3	3	9	12	75	9	8	6	3	3	3	0	3	0	0	0	3	2	0	3	0	0	0	0	0	0	1	0	0	0	0	0	3	3	2	3	3	2	3	2	3	3	3	2	2	2
m8988235109	40	1	1	4	4	10	15	34	14	9	9	3	3	3	1	3	1	1	1	3	3	1	3	1	1	1	1	1	1	1	0	0	0	0	0	1	1	2	3	3	1	2	3	2	2	2	3	2	2
m89785948027	39	1	0	2	2	12	14	79	7	8	5	3	2	2	1	2	1	1	1	2	2	1	2	1	1	1	1	1	1	0	0	0	0	0	1	2	2	2	2	1	2	4	4	2	2	3	2	2	3
m8935629536	49	1	0	5	5	7	3	52	12	12	11	4	4	2	1	2	1	0	1	5	5	0	2	0	0	0	1	0	1	0	0	0	0	0	1	1	1	5	5	5	5	5	1	1	1	1	4	1	1
m8974610887	36	0	1	3	4	11	14	63	9	7	6	4	2	3	1	2	1	0	0	3	2	0	2	1	0	0	0	0	0	0	0	1	0	0	0	3	2	1	4	3	3	2	2	4	4	2	2	2	2
m89789623406	37	1	1	4	4	14	19	29	15	7	12	4	4	2	1	2	1	0	0	4	2	1	3	0	0	1	1	1	1	1	0	0	0	0	0	3	3	3	4	4	2	2	5	1	1	1	4	1	2
m8971291146	41	1	0	1	2	8	8	66	7	9	8	3	2	4	0	2	0	0	1	2	3	0	4	1	0	0	1	0	0	0	0	1	0	0	0	1	2	3	2	2	4	3	4	2	2	4	4	3	4
m8993228184	61	1	0	4	4	12	12	37	11	11	7	3	4	2	1	3	1	1	1	3	3	1	3	0	0	0	0	1	0	1	0	0	1	0	0	1	3	3	5	5	3	2	3	3	3	3	4	1	1
m89787216601	44	1	0	2	2	8	9	72	7	9	9	3	2	3	1	3	1	1	1	3	3	1	3	1	0	0	1	1	1	1	0	0	0	0	0	1	3	1	3	3	3	3	2	3	3	3	2	3	2
m8932141730	50	0	1	2	1	8	10	74	12	9	8	4	4	3	0	4	0	0	0	2	3	1	2	0	0	0	0	0	0	1	0	0	1	0	0	2	2	4	4	4	4	2	2	4	4	3	3	2	2
m89384558436	49	0	1	5	3	12	12	63	12	7	9	2	3	3	0	4	0	0	0	4	4	0	2	0	0	0	0	1	1	1	0	1	1	0	0	1	3	5	4	4	3	3	4	3	3	3	2	4	2
m89786842289	34	0	0	4	4	11	14	43	12	6	7	5	3	3	1	4	1	0	0	5	5	1	3	1	1	0	1	1	1	1	1	0	0	0	0	1	5	3	5	2	5	4	1	4	5	1	3	4	1
m89787800512	45	1	0	4	2	12	13	59	11	4	7	3	2	3	1	2	1	1	1	2	2	0	2	0	1	1	1	0	1	1	0	1	1	0	0	1	2	1	4	4	2	1	4	3	4	3	1	2	3
m89784555271	40	0	1	3	4	8	9	68	8	10	10	4	5	3	0	2	0	0	1	3	4	0	4	0	1	1	1	1	1	1	1	0	0	0	0	2	2	5	4	4	3	4	5	1	1	1	1	1	1
m8938414080	49	0	0	2	2	7	8	64	6	6	8	2	3	4	0	2	0	1	1	2	2	1	2	1	1	1	0	1	1	0	0	1	1	0	0	2	2	2	2	1	2	3	3	2	2	3	2	3	2
m89789178874	41	0	1	1	1	13	6	78	13	10	7	5	5	2	1	3	1	0	1	2	5	0	2	0	0	0	0	1	1	1	0	0	0	0	0	5	1	3	5	4	2	2	4	3	2	2	3	4	4
m89786299770	44	1	0	4	3	8	8	73	9	6	6	3	3	3	0	3	0	1	0	3	3	0	1	0	0	0	0	1	0	1	0	0	1	0	0	2	1	5	4	4	1	1	3	3	3	2	2	2	2
m89788733483	49	1	0	5	3	11	12	62	10	6	8	3	3	5	1	5	1	1	1	4	4	1	4	1	1	0	1	1	1	1	0	0	0	1	0	1	3	1	4	4	3	1	2	4	4	4	1	3	2
m89787556062	46	1	0	4	4	11	16	48	14	3	4	5	5	4	0	5	0	0	0	3	4	0	2	0	0	0	0	1	1	1	0	0	1	0	0	1	2	2	4	4	2	2	1	3	3	1	2	2	1
m89923252	38	0	1	5	5	15	18	31	12	12	12	5	5	4	1	5	1	1	1	4	4	0	5	0	0	1	1	1	1	1	0	0	0	0	0	1	1	5	5	5	1	3	5	1	1	1	1	2	3
m8971198865	51	0	0	4	4	12	15	43	12	7	6	5	2	4	1	5	1	1	1	5	4	0	2	0	0	0	1	0	1	1	0	0	0	0	0	1	1	1	4	5	3	1	4	3	3	1	2	2	2
m89785417058	56	1	0	3	2	9	12	49	10	6	6	3	4	3	0	3	0	0	0	3	2	0	3	1	1	1	0	1	1	1	0	1	1	0	0	2	2	3	2	2	2	3	2	2	2	3	1	2	2
m8932219555	22	0	1	4	2	6	5	45	3	4	5	5	1	1	1	1	1	1	1	5	1	1	1	1	1	1	1	1	1	1	0	0	0	0	0	1	1	1	1	1	1	1	1	1	1	1	1	1	1
m8993082019	48	0	1	1	1	3	3	38	3	3	3	1	1	1	1	1	1	1	1	1	1	1	1	1	1	1	1	1	1	1	0	0	0	0	0	1	1	1	1	1	1	1	1	1	1	1	1	1	1
m8970915020	26	1	0	5	5	15	14	57	11	3	3	2	2	2	1	2	1	1	1	3	2	1	2	0	0	1	1	0	1	1	0	0	1	0	0	1	3	2	4	4	2	1	5	5	5	5	2	3	2
m89783916222	54	1	0	4	3	12	13	45	11	6	6	4	3	4	1	4	1	1	1	4	3	0	2	0	0	0	1	0	1	1	0	0	1	1	0	3	3	3	4	4	4	3	2	2	2	3	2	2	2
m89385456763	21	0	1	5	4	10	5	47	13	11	11	2	5	3	0	2	0	1	1	3	3	0	4	0	1	1	0	1	1	0	0	0	0	0	1	1	1	1	5	2	1	1	1	1	1	1	2	1	1
m89789489545	43	0	1	1	1	6	9	48	4	5	4	2	2	3	1	3	1	1	1	2	2	0	2	0	0	0	1	1	1	0	0	1	0	0	0	1	2	1	2	2	2	2	2	1	2	2	2	2	2
m8931970368	27	1	1	2	3	9	12	84	10	8	9	3	2	2	1	3	1	1	1	2	2	1	2	1	0	1	1	1	0	0	0	1	0	0	0	2	4	2	2	4	2	2	2	2	4	2	2	2	2
m89787032191	44	1	0	4	2	14	15	33	11	6	6	4	2	3	0	2	0	0	0	3	4	0	2	0	0	0	0	1	1	1	0	1	0	0	0	3	3	4	4	2	1	2	2	4	3	3	2	5	3
m89384000182	29	0	0	5	5	14	18	53	13	3	4	5	4	4	1	4	1	1	1	4	4	1	3	0	0	0	1	1	1	1	0	1	0	0	0	1	1	3	5	5	1	5	4	4	4	4	4	2	2
m8936513264	41	1	0	5	5	12	11	40	12	6	6	5	5	5	1	5	1	1	1	4	4	1	4	0	0	1	0	1	1	0	0	0	0	0	1	1	1	3	5	5	1	4	5	1	2	1	2	3	2
m89788954091	38	1	1	4	4	12	9	75	8	3	6	5	2	4	1	3	1	0	1	3	3	1	4	0	0	1	1	0	1	1	0	0	0	0	0	2	1	2	3	4	3	2	4	5	5	1	2	3	2
m8998618970	58	0	1	5	4	12	12	47	11	8	8	4	4	4	1	3	1	1	1	4	5	0	1	0	0	0	1	1	1	1	0	0	0	0	0	1	1	5	4	5	2	3	5	4	2	1	2	1	1
m89784976152	26	0	1	4	2	10	6	71	14	7	3	4	5	5	1	5	1	1	1	3	4	1	2	0	0	0	1	1	1	1	0	0	0	0	0	1	1	5	2	4	2	3	5	5	1	1	3	3	3
m89385304592	45	0	0	1	1	8	12	60	9	6	6	3	3	2	1	2	1	1	1	3	2	1	2	1	1	1	0	1	1	1	1	1	1	0	0	4	4	5	2	2	4	3	2	4	4	4	1	2	2
m8936250274	47	1	1	5	4	12	7	84	12	4	5	3	3	3	1	3	1	0	0	3	5	0	1	1	1	1	0	1	1	0	0	0	0	0	1	3	1	2	3	3	2	1	2	3	3	3	3	2	2
m8995468311	46	1	0	5	4	12	19	88	12	11	8	1	2	2	0	2	0	1	1	2	2	1	3	1	1	0	1	1	0	0	1	0	0	1	0	4	5	2	5	3	2	3	2	5	4	3	3	2	3
m8935394525	57	1	1	4	2	6	8	45	12	10	11	2	2	1	1	1	1	1	1	3	4	1	4	0	0	1	0	1	1	1	0	0	1	1	0	1	3	2	5	3	4	1	4	2	1	1	4	4	2
m89784129984	41	1	0	4	3	9	11	39	12	6	6	3	3	2	0	3	0	0	0	4	2	0	2	0	0	1	0	1	0	1	1	0	0	0	0	2	2	2	3	4	3	3	5	3	3	2	1	2	2
m899405086	62	1	1	4	3	9	13	47	12	8	7	3	2	2	1	2	1	0	0	4	1	1	4	0	0	1	1	1	1	0	0	0	0	0	1	1	1	2	3	5	3	2	4	3	3	3	4	1	2
m89384831231	35	1	1	5	4	10	10	40	14	3	4	5	4	3	1	5	1	1	1	3	4	0	2	0	0	0	1	0	1	0	0	0	0	0	1	1	1	1	4	4	1	1	4	3	3	1	4	5	2
m8938236647	48	0	1	2	1	6	8	81	11	10	6	3	4	3	0	5	0	0	0	2	4	0	1	0	0	1	0	1	0	1	0	0	0	0	0	2	1	5	4	4	3	2	4	2	2	1	3	2	2
m89784684724	31	0	1	4	4	9	12	69	9	8	9	3	3	3	1	3	0	1	0	3	3	1	3	0	0	0	1	1	1	1	1	0	0	0	0	1	1	3	3	3	3	3	2	3	3	1	1	3	3
m89785526591	42	1	1	1	3	14	9	36	14	7	9	3	3	2	0	4	0	0	0	4	4	0	2	0	0	0	0	1	1	1	1	0	0	0	0	1	1	2	5	5	2	2	5	3	3	3	3	3	2
m89784041639	44	1	1	5	5	12	14	58	13	4	3	5	5	4	1	2	1	1	1	3	2	1	4	0	0	1	1	0	1	1	0	0	1	0	0	1	3	5	4	4	3	3	4	4	5	5	3	3	2
m89786048312	33	0	1	4	4	12	13	54	11	7	3	2	2	2	1	3	1	0	0	4	2	1	3	0	0	0	1	1	1	1	0	0	0	0	0	1	1	4	5	5	3	1	2	3	1	1	1	1	1
m8936269855	32	0	0	1	2	7	11	77	8	7	8	3	3	3	0	2	0	1	1	3	3	1	2	1	1	1	1	1	1	0	1	1	1	0	0	2	2	2	3	2	3	3	3	3	3	3	2	3	3
m89783652251	29	1	1	5	4	11	14	49	14	6	7	5	5	5	1	2	1	1	1	5	5	0	2	0	0	0	1	1	1	1	0	0	0	0	0	3	3	4	1	4	3	3	1	4	4	4	4	1	2
m8970625395	37	0	1	4	4	11	12	62	11	6	7	4	2	3	1	3	1	1	1	3	4	1	2	0	0	0	1	0	1	1	0	0	0	0	0	3	2	4	2	5	2	2	5	3	1	1	4	1	2
m893662204	59	1	0	5	5	15	13	54	14	7	6	3	4	3	1	5	1	1	1	3	2	1	4	0	0	1	1	0	1	1	0	0	0	1	0	1	2	2	4	5	2	1	4	3	1	2	3	3	2
m8932855096	38	1	1	5	4	14	20	98	15	4	4	4	3	4	1	4	1	1	1	4	4	1	5	1	1	1	1	1	1	1	1	1	1	0	0	5	5	5	5	5	5	4	4	5	5	4	3	4	4
m89785470809	35	0	0	1	1	14	18	64	15	7	4	4	5	5	1	5	1	1	1	5	5	1	5	1	1	1	1	1	1	1	1	1	0	0	0	3	3	5	5	5	5	5	4	3	3	5	5	3	1
m8934541066	46	1	0	5	4	12	14	53	10	4	4	4	2	1	1	1	1	0	1	3	4	1	3	1	1	1	1	1	1	1	1	1	0	0	0	5	4	3	4	5	4	4	4	4	5	5	3	4	4
m8931988521	49	1	0	2	2	6	11	62	10	6	6	3	2	2	0	3	1	0	1	2	2	0	2	0	0	1	0	0	1	1	0	0	1	0	0	2	3	2	4	4	3	2	3	2	2	2	1	3	2
m8998783599	46	1	0	2	2	6	6	44	6	6	6	2	3	3	1	2	0	0	0	2	2	0	1	0	0	0	1	1	1	1	0	0	1	0	0	3	3	3	3	3	3	2	2	3	3	3	3	3	2
m89784000595	53	1	0	4	4	11	13	52	12	7	7	4	4	2	1	2	1	1	1	4	4	1	4	0	0	0	1	0	1	1	0	0	1	0	0	3	2	1	4	4	2	1	2	3	4	3	1	3	2
m8971553720	38	1	1	4	4	11	16	64	13	9	8	5	5	4	0	4	0	0	0	4	5	0	2	0	0	1	0	1	0	1	1	0	0	0	0	1	1	2	5	5	4	2	4	3	3	3	2	2	2
m8994413236	31	1	1	4	4	10	7	38	11	7	10	3	5	3	1	3	1	1	1	4	4	1	4	0	0	0	1	1	1	0	0	0	0	0	1	1	2	2	3	4	2	1	2	1	1	5	5	1	1
m89788843484	50	0	1	2	2	6	6	69	9	6	6	3	3	2	0	3	0	0	0	3	2	0	2	0	0	0	0	1	0	1	0	0	1	0	0	4	4	5	2	2	4	3	3	4	3	3	2	3	1
m89384127162	33	0	1	5	4	13	16	44	14	6	7	4	4	3	0	2	0	0	0	2	4	0	1	0	0	0	0	1	1	1	1	0	0	0	0	2	1	4	4	5	1	2	2	1	1	1	1	1	2
m89788542617	44	0	1	2	3	9	11	71	11	6	6	3	3	2	0	3	0	1	1	2	3	1	1	0	1	0	1	1	1	0	0	1	0	1	0	3	2	3	3	2	3	3	3	1	3	3	2	4	3
m89786904088	36	0	0	4	4	15	16	41	12	6	3	5	3	4	1	5	1	0	1	3	4	0	1	0	1	1	1	1	1	1	0	0	0	0	0	1	1	2	5	5	1	3	5	1	1	1	4	1	1
m89788218380	38	0	1	4	3	10	13	64	12	6	7	2	2	3	0	4	0	0	0	3	2	0	4	0	0	0	0	1	1	1	1	0	0	0	0	5	4	5	2	4	3	3	1	5	5	5	4	2	2
m8932855025	43	0	1	4	3	8	9	66	10	8	9	4	3	2	0	2	0	0	0	2	3	0	1	0	0	0	0	1	1	0	0	0	0	0	1	1	1	2	3	3	2	2	4	2	2	1	3	1	2
m89788871563	36	0	0	5	4	14	20	42	15	12	8	5	5	3	0	3	1	0	0	4	4	0	3	0	0	0	0	1	1	0	0	0	0	0	1	5	2	3	2	4	4	5	1	3	4	4	5	1	1
m89783595739	32	0	1	2	3	7	9	84	12	9	11	2	3	2	1	2	1	1	1	4	3	1	1	1	1	1	1	1	1	0	1	0	0	1	1	1	2	3	3	2	3	3	2	2	1	2	2	2	2
m8931040837	37	0	1	4	4	10	10	38	12	7	7	4	5	2	0	3	1	0	0	3	4	1	2	0	1	0	1	1	1	1	0	1	1	0	1	2	2	4	4	4	3	4	4	2	2	1	1	4	2
m89784562480	42	0	1	3	3	9	13	73	10	6	7	3	2	4	0	3	0	0	1	3	3	0	3	0	0	0	0	0	0	0	0	0	0	1	0	3	2	3	3	2	3	2	3	3	2	3	3	3	3
m89788621198	27	0	1	3	3	8	11	81	12	6	8	4	3	3	1	3	0	0	0	3	3	0	1	0	0	0	0	0	0	1	0	0	0	0	0	2	4	4	4	3	4	5	4	3	4	5	5	1	1
m89786422151	39	0	1	3	3	9	12	88	9	8	4	3	3	3	1	2	1	1	1	3	4	1	4	1	1	0	1	0	1	1	1	1	1	0	0	1	2	3	3	3	4	4	1	3	3	1	5	4	2
m8972646069	39	1	0	1	4	9	5	107	10	10	8	1	1	1	1	1	1	1	1	1	1	1	4	1	1	1	1	1	1	1	1	0	1	0	0	5	3	3	5	4	4	4	4	4	3	4	4	4	4
m89786611523	39	1	0	2	2	9	12	62	12	5	5	2	2	2	1	2	1	1	1	3	2	1	3	1	1	1	0	0	1	1	1	1	0	0	0	3	3	2	2	2	3	2	4	3	3	3	2	2	2
m89786817662	30	0	0	5	5	14	18	98	14	3	6	5	1	5	1	5	1	1	1	4	4	1	3	1	1	1	1	1	1	1	1	1	0	0	0	5	5	4	5	5	4	3	4	5	5	5	4	3	3
m89385679850	44	1	0	2	2	7	13	57	6	6	6	4	2	5	1	4	1	1	1	1	4	1	5	1	1	0	1	1	1	1	1	1	1	1	1	4	4	3	2	2	3	4	3	3	3	3	4	4	2
m89786870734	45	1	1	2	2	6	13	63	7	8	6	2	3	2	1	2	1	1	1	2	2	1	2	1	1	1	1	0	1	0	0	0	1	0	0	2	1	3	2	2	2	3	2	2	2	2	2	3	2
m8993872228	52	1	1	3	3	9	6	73	9	7	8	3	3	3	1	3	1	1	1	3	5	1	4	1	0	0	0	0	0	0	0	0	0	0	1	1	1	1	3	3	1	1	3	1	1	1	4	1	1
m8992163112	38	0	1	4	4	12	12	51	12	6	7	5	5	4	1	4	0	0	0	3	4	0	2	0	0	0	1	1	1	0	0	0	0	0	1	1	1	4	4	4	2	3	4	3	3	3	4	1	1
m89983633033	39	0	1	4	3	15	18	62	13	3	3	5	3	5	0	5	0	0	0	4	2	1	3	0	0	0	0	1	1	1	0	1	0	0	0	2	3	5	4	2	3	1	1	5	5	5	1	3	2
m89989637227	48	0	1	5	5	9	8	35	12	12	12	5	5	3	0	3	0	0	0	3	4	0	1	0	1	0	0	1	1	1	0	0	0	0	0	5	4	5	5	5	3	1	4	2	2	2	3	1	1
m89787431592	53	1	0	4	4	8	18	42	12	6	5	3	4	3	1	3	1	1	1	3	2	0	3	0	1	1	1	1	1	1	0	0	1	0	0	1	1	2	2	5	1	1	4	4	4	3	2	5	3
m8931006183	28	1	1	5	4	13	17	52	15	12	9	3	3	4	0	1	1	1	0	3	5	0	3	0	0	1	1	1	1	0	0	0	0	0	1	1	1	1	5	5	1	2	5	3	3	4	5	2	2
m899455464	58	1	1	5	5	15	20	34	15	6	4	5	3	5	1	5	1	1	0	4	4	0	2	0	1	1	1	0	1	1	0	0	0	0	0	1	1	3	4	4	3	1	5	4	4	4	4	1	1
m89986637091	26	0	0	3	3	9	9	75	9	6	6	4	2	1	1	1	1	1	0	2	1	0	3	0	0	0	1	0	1	1	0	0	0	0	1	1	3	3	4	3	3	3	1	4	4	4	5	1	1
m8998541369	64	1	1	4	4	12	12	35	14	11	8	5	5	4	0	4	0	1	0	4	4	0	2	0	0	0	0	1	1	1	0	0	0	0	0	3	2	2	5	5	2	1	4	2	1	1	1	1	1
m89783836574	40	1	1	5	4	8	9	88	9	5	7	2	3	4	1	2	1	1	1	4	4	1	2	0	0	0	1	0	1	1	0	0	0	0	0	1	2	2	3	4	1	2	5	2	1	1	1	5	1
m89384296317	39	0	1	2	1	6	18	87	13	10	11	1	2	4	1	2	1	1	1	3	2	1	2	1	1	0	1	0	1	0	1	0	1	0	1	2	1	2	2	1	2	2	2	3	4	5	3	3	3
m8992839547	66	1	1	5	5	11	5	36	13	9	9	3	4	3	1	5	1	1	1	4	4	0	2	0	0	0	1	1	1	1	0	0	0	0	0	1	3	3	4	5	3	3	5	3	3	1	1	1	1
m8972016675	33	0	1	3	3	9	10	78	10	9	6	5	3	3	0	3	0	0	0	5	4	0	3	0	0	0	0	1	1	1	1	0	0	0	0	3	3	5	5	4	5	3	3	3	2	4	3	2	2
m8934199464	39	1	0	4	4	15	19	61	12	5	4	5	2	4	1	4	1	1	1	4	5	1	5	1	1	1	1	1	1	0	0	0	0	0	1	3	3	5	4	4	3	3	4	4	4	4	1	5	3
m89789856212	47	1	0	4	4	11	14	59	12	7	6	4	4	3	1	4	1	1	1	4	4	1	2	1	1	1	1	1	1	1	0	1	1	0	1	4	4	3	4	4	4	2	4	4	3	4	2	2	2
m8998377815	32	1	1	4	4	9	12	37	11	8	7	4	3	4	1	3	1	1	1	3	3	0	1	0	0	1	0	0	1	0	0	0	0	0	1	4	1	1	4	4	2	1	4	3	2	3	1	2	2
m8932855110	40	1	1	5	5	15	21	29	15	7	3	5	5	4	1	4	1	1	1	5	4	1	3	1	1	1	1	1	1	1	0	1	1	0	0	1	1	3	5	5	5	3	5	3	3	3	2	2	2
m89785768224	46	0	0	2	2	9	10	53	13	9	9	5	3	4	1	5	1	1	1	4	4	1	3	0	0	0	1	1	1	1	0	0	0	0	0	1	1	3	5	5	1	5	3	3	3	3	5	1	1
m899175576	39	1	0	5	5	15	21	29	15	12	6	3	3	3	1	3	1	1	1	3	5	1	4	1	1	1	1	1	1	1	1	1	1	0	1	1	1	3	5	5	3	3	5	1	1	1	2	2	3
m8976667035	55	1	1	5	5	13	10	40	14	9	7	3	3	3	1	3	1	1	1	3	3	0	2	0	0	0	0	1	1	1	0	0	0	0	0	2	2	2	4	4	2	1	3	2	2	2	4	4	1
m8991904303	64	1	0	4	3	13	15	46	14	6	7	3	4	3	1	2	1	1	1	3	4	1	4	1	1	1	1	1	1	1	0	0	0	0	0	2	2	1	4	4	2	1	3	4	4	4	1	1	2
m89788556850	26	0	0	3	3	7	9	66	6	7	6	2	2	2	0	2	1	0	1	2	3	1	2	1	0	0	0	1	1	0	1	0	0	0	0	1	2	2	3	3	1	2	2	2	1	2	2	3	2
m899462600	58	1	0	4	3	11	15	41	14	9	9	5	5	3	1	3	1	1	1	4	4	0	2	0	0	0	1	1	1	1	0	0	0	0	0	1	2	2	4	4	2	2	4	3	3	2	2	2	2
m89783724205	62	1	0	3	3	10	14	45	10	7	6	4	2	4	1	2	1	0	0	3	3	0	2	0	0	0	0	1	1	1	0	0	0	0	0	2	2	2	3	3	3	1	3	3	3	3	1	1	2
m89783772475	35	1	0	3	3	11	12	52	9	6	6	3	3	3	1	3	1	1	0	3	3	1	3	1	1	1	1	1	1	1	1	1	1	0	1	3	3	3	2	2	3	3	3	3	3	3	2	2	2
m89786733254	34	0	0	5	5	15	14	43	15	8	9	5	4	5	1	5	1	1	1	4	5	1	5	1	1	1	1	1	1	1	1	1	1	0	0	1	1	5	5	5	2	5	4	3	1	1	3	5	2
m89784962396	45	0	1	4	5	11	8	61	8	7	10	3	3	3	1	2	1	0	0	4	2	0	3	0	0	0	0	0	0	0	0	0	1	0	0	3	3	2	3	3	2	3	3	3	3	3	3	2	2
m89785072166	39	1	1	4	3	6	12	60	8	7	5	5	5	2	1	2	1	0	1	5	5	1	4	0	0	0	1	1	1	0	0	0	0	0	1	1	1	1	5	4	1	1	4	5	2	5	4	1	1
m89786331793	33	0	1	5	4	9	9	61	12	7	10	1	3	5	1	3	1	0	0	3	4	0	2	0	0	0	1	0	1	0	0	0	0	0	1	1	3	1	4	4	3	1	3	3	1	1	2	1	1
m8931717487	39	1	0	1	2	12	17	57	9	8	6	3	4	4	1	4	0	1	1	4	4	1	3	1	1	0	1	1	1	0	1	0	0	0	1	3	4	3	4	4	4	4	3	5	4	4	4	3	3
m8970972990	25	0	1	4	4	15	21	38	15	3	3	3	3	2	1	2	1	1	0	5	2	1	4	1	1	1	1	1	1	0	0	0	0	0	1	1	1	3	5	5	2	1	4	4	4	4	1	2	1
m89783504969	38	1	0	4	4	12	9	36	11	9	8	3	3	3	1	3	1	0	0	3	2	1	4	0	0	1	0	1	1	1	1	0	0	0	0	4	3	2	4	4	2	1	3	4	3	3	1	2	2
m899048222	52	1	1	5	5	15	3	61	15	6	6	3	3	3	1	3	1	1	1	3	5	0	2	0	0	0	0	1	1	1	0	0	0	0	0	1	1	1	3	3	1	1	5	3	3	3	4	4	1
m89786315582	57	1	0	3	3	6	12	79	10	7	7	2	3	3	1	2	1	1	1	3	3	1	3	1	1	0	1	0	1	1	0	0	0	1	0	1	1	1	4	4	4	1	5	3	3	3	1	4	2
m89787956915	30	0	1	5	4	13	5	50	13	8	8	4	2	4	1	4	1	0	0	5	4	0	2	0	0	0	0	1	1	1	0	0	0	0	0	5	1	3	4	5	1	2	5	1	1	1	4	5	2
m8970248570	47	0	1	5	5	11	12	44	14	8	7	5	4	5	0	4	0	0	0	4	4	1	3	0	0	0	0	1	1	1	0	1	1	0	0	3	3	1	4	4	3	1	4	4	4	4	4	1	1
m8932947880	52	1	1	4	3	9	12	51	12	9	6	2	2	2	1	1	1	0	1	2	3	0	1	0	1	0	0	1	1	1	0	0	1	0	0	2	1	3	3	4	2	2	4	1	2	1	4	3	2
m8974975920	55	1	1	3	4	8	11	41	5	8	8	3	4	2	1	2	1	1	1	4	4	1	3	1	1	1	1	0	1	1	0	0	0	1	0	1	2	2	4	5	3	1	2	3	3	2	1	2	2
m89787910897	65	1	0	5	5	13	18	35	15	10	5	4	4	4	1	4	1	1	0	3	4	0	1	0	0	0	1	1	1	1	0	0	0	1	0	2	2	2	4	4	2	2	4	4	3	3	4	2	2
m8931953683	24	1	1	2	2	7	11	61	9	8	7	4	2	3	1	2	1	1	1	4	4	0	2	0	0	1	1	0	1	0	0	0	0	0	1	1	2	2	4	5	2	1	4	2	1	1	2	2	2
m8935155297	37	1	1	5	5	11	12	45	6	5	3	3	3	3	1	4	1	1	1	3	1	1	2	1	1	0	1	1	1	1	0	0	0	0	0	1	1	3	3	3	3	3	4	3	3	1	3	5	4
m89987967489	64	1	1	5	5	12	12	45	13	9	6	4	4	3	1	3	1	1	1	4	3	0	2	0	0	0	1	0	1	1	0	0	0	0	0	1	3	2	4	5	3	2	3	2	2	3	3	1	1
m89788827649	51	0	1	4	4	9	12	58	11	6	6	4	3	3	0	3	1	1	0	3	3	0	2	0	0	0	0	1	1	1	0	0	0	0	0	3	3	4	4	3	3	2	3	4	4	3	2	3	2
m8992556211	42	1	1	5	3	11	10	37	10	9	6	4	2	2	1	2	1	1	1	3	4	1	4	0	0	1	0	1	1	1	1	0	0	0	0	2	3	3	4	5	3	1	4	2	2	1	1	2	2
m8973179647	49	1	0	5	3	12	13	43	14	7	8	4	5	3	0	5	0	0	0	2	5	0	2	0	0	0	0	1	1	1	1	1	0	0	0	3	1	2	4	5	3	3	4	2	3	3	4	1	2
m8998249027	63	1	0	2	2	9	12	44	7	7	7	3	3	3	1	2	1	0	0	3	2	0	2	0	0	1	0	1	1	1	0	0	0	1	0	3	3	1	3	3	3	2	4	3	3	3	2	2	2
m8998497218	50	0	1	4	4	12	12	80	11	9	9	4	3	4	0	5	1	1	1	4	3	0	2	0	0	1	0	1	1	1	0	0	1	0	0	2	2	4	3	3	3	1	5	4	4	2	1	2	2
m8994958033	65	1	1	4	4	8	9	58	6	9	9	3	4	3	1	3	1	0	1	3	3	0	2	0	1	0	1	0	1	1	0	0	0	0	0	1	3	4	4	4	3	2	2	3	3	3	2	1	1
m8931690796	53	0	1	4	4	12	18	93	12	12	12	4	2	4	1	4	1	1	1	4	1	0	2	0	0	0	0	0	0	1	0	0	0	1	0	2	2	5	4	4	2	4	2	2	2	2	1	1	1
m89784384201	42	0	1	4	1	3	9	75	14	9	11	2	1	1	1	2	1	1	1	2	4	1	3	0	0	0	1	0	1	0	0	0	0	0	1	1	4	2	5	4	4	1	5	3	2	2	4	4	3
m89783633498	34	1	0	4	4	11	9	78	8	9	7	3	3	3	1	2	1	1	1	2	4	0	2	0	0	1	1	1	1	1	1	0	0	0	0	4	5	2	5	4	4	4	3	4	3	4	3	3	3
m89384067528	52	0	1	5	5	15	14	44	12	7	6	5	5	5	1	5	1	1	1	4	4	1	2	0	0	0	1	0	1	1	0	0	0	0	0	1	1	4	4	4	1	1	5	2	2	2	2	3	2
m8974412059	33	0	1	5	3	11	12	50	12	9	9	4	2	4	0	3	0	0	0	3	4	0	3	0	0	0	0	1	1	1	1	0	0	0	0	3	2	4	4	4	2	2	5	1	1	1	3	2	1
m8976109958	54	1	1	4	4	10	16	42	11	7	7	2	2	3	1	3	1	1	1	4	4	1	2	0	1	1	1	1	1	0	0	0	0	0	1	1	1	5	4	4	2	3	4	3	2	2	4	2	2
m8934773974	28	1	1	5	5	15	3	38	3	3	3	1	1	1	1	1	1	1	1	1	1	1	1	1	1	1	1	1	1	1	0	0	0	0	0	1	1	1	1	1	1	1	1	1	1	1	1	1	1
m8975130054	28	1	1	5	3	8	12	51	11	7	9	2	2	2	1	2	1	0	1	4	2	1	3	0	1	0	1	1	1	0	0	0	0	0	1	1	3	1	4	4	3	1	4	2	2	2	5	1	1
m8971888677	26	0	1	5	5	15	21	34	15	5	6	4	4	2	1	2	1	1	1	4	4	1	5	1	1	1	1	1	1	0	0	0	0	0	1	1	2	2	4	4	1	1	4	3	3	3	1	3	1
m8932852248	35	1	0	5	5	14	8	47	14	7	7	5	2	5	0	5	0	0	0	5	4	0	2	0	0	0	0	1	1	1	1	1	0	0	0	5	3	3	4	4	3	1	5	3	1	1	3	3	2
m89786221752	54	1	0	5	4	9	4	56	15	11	12	3	2	3	1	3	1	1	1	3	3	1	4	0	0	1	0	0	1	1	0	0	0	0	0	1	1	2	3	4	3	2	4	4	2	2	3	3	2
m89386025535	35	1	1	5	5	12	9	50	11	7	7	5	3	5	1	5	1	1	1	4	4	0	2	0	0	0	0	0	1	1	1	1	0	0	0	1	1	2	4	5	2	2	5	2	2	2	3	2	2
m8970926515	52	1	1	3	4	9	15	57	11	6	4	5	3	5	0	2	0	1	0	3	3	0	4	1	0	0	0	1	1	0	0	0	0	0	1	1	3	4	5	5	3	3	2	3	1	2	2	1	1
m8970317986	33	0	1	2	2	7	13	78	8	8	7	2	2	2	1	2	1	1	1	2	3	0	2	0	0	1	0	0	1	1	1	1	0	0	0	2	3	3	2	1	4	3	2	2	3	2	3	2	2
m89386526550	35	0	1	4	2	7	3	52	12	7	8	2	2	2	1	2	0	0	0	4	2	0	2	0	0	0	0	1	0	1	0	1	0	0	1	1	3	5	2	2	4	5	4	3	3	5	2	3	2
m89789858166	44	1	0	2	2	10	14	71	13	5	4	2	2	2	1	3	1	1	1	2	2	1	3	0	1	0	0	1	1	1	0	1	1	0	1	3	3	2	5	5	2	2	4	4	4	4	1	1	2
m89384032524	66	1	0	1	2	10	12	59	11	4	7	2	3	2	1	3	1	1	1	4	3	0	2	1	0	0	1	1	1	1	0	0	0	0	1	1	2	1	2	2	2	1	1	4	3	3	1	1	1
m89787815469	46	1	1	4	4	10	9	66	12	6	7	4	3	2	0	2	0	0	0	3	4	0	1	0	0	1	0	1	1	1	0	0	1	0	0	3	2	2	4	5	2	2	5	4	2	2	1	3	2
m8994386575	50	1	1	5	5	12	12	42	15	12	12	3	4	3	1	3	1	1	1	3	4	1	2	0	0	0	1	1	0	1	0	0	1	0	0	5	5	4	5	5	3	2	4	3	3	3	5	1	1
m8934744084	47	1	0	4	2	7	14	72	10	8	9	2	4	3	0	3	0	0	1	3	2	0	3	1	1	0	1	0	0	1	0	1	0	0	0	3	3	3	2	2	4	1	2	2	2	3	3	3	3
m89784127574	33	0	1	2	2	6	9	78	7	6	6	2	3	2	1	2	0	0	1	2	3	0	2	0	1	1	0	1	1	0	0	1	0	0	0	2	2	3	2	3	2	4	2	1	1	2	2	3	3
m89784995085	30	0	1	4	3	13	14	47	11	7	6	3	4	3	1	2	0	0	0	3	3	1	1	0	0	0	1	1	0	1	1	0	0	0	0	3	3	3	3	3	3	1	4	3	4	2	2	3	2
m8992506857	57	1	1	4	4	10	12	40	14	7	6	4	4	4	1	5	1	0	1	4	4	0	2	1	1	0	1	0	1	1	0	0	0	0	0	1	2	2	4	5	3	1	4	3	3	3	3	2	2
m89987144415	42	1	0	4	4	13	14	32	13	8	6	4	4	3	1	3	1	1	1	4	4	1	4	1	1	1	1	0	1	1	0	0	0	0	1	1	1	3	4	4	1	2	2	2	2	1	1	2	2
m8991544830	64	1	0	5	5	15	21	35	13	5	4	4	5	3	1	3	1	1	1	4	3	0	3	0	0	0	1	1	0	1	0	0	0	0	0	1	1	1	4	4	2	1	1	4	5	5	5	3	4
m8991920033	50	0	1	4	3	10	16	63	10	4	6	3	2	2	0	3	1	1	0	2	2	0	4	0	0	0	0	0	0	1	0	1	0	0	0	3	3	3	3	3	3	2	3	3	4	3	4	1	2
m8932854880	44	0	1	5	4	9	14	52	13	6	6	4	3	3	0	3	1	0	0	3	3	0	3	0	0	0	0	1	1	0	0	0	0	0	1	2	3	1	3	3	2	1	2	4	3	3	5	1	1
m8936787576	34	0	1	5	5	15	6	35	6	8	6	5	3	3	1	3	1	0	0	4	1	0	3	0	0	1	0	0	0	0	0	0	0	0	1	1	1	5	5	5	1	1	5	1	1	1	4	1	1
m8998284338	53	1	0	4	2	8	9	42	12	9	9	2	2	3	0	3	0	0	0	3	4	0	2	0	0	0	0	1	0	1	0	0	0	1	0	1	1	1	2	3	1	1	4	3	3	2	4	4	2
m8998706312	46	1	0	5	5	14	14	34	9	3	3	5	5	5	1	5	1	1	1	5	5	1	4	1	1	1	1	1	1	1	0	0	1	0	0	1	1	5	5	5	1	2	2	4	4	1	1	5	1
m89786050309	44	1	0	4	4	12	16	50	10	5	4	4	4	4	1	4	1	1	1	4	4	1	4	0	1	1	0	0	1	1	0	1	1	0	1	3	2	2	4	4	2	3	4	2	3	2	2	2	2
m89789967510	65	1	1	4	3	13	16	48	12	8	8	5	5	4	1	3	0	0	0	2	2	0	2	0	1	1	1	1	1	1	0	0	0	0	0	1	1	1	5	3	1	4	4	3	3	4	2	3	3
m89787141954	49	1	1	4	2	10	12	49	11	6	6	4	2	3	0	3	1	1	1	4	4	1	1	0	0	0	1	1	0	1	0	0	1	0	0	2	2	2	2	4	2	1	5	2	2	2	1	1	2
m89384919006	57	1	0	5	4	13	17	38	12	7	6	4	1	4	1	5	1	1	1	1	5	1	5	1	1	1	1	1	1	1	0	0	1	0	1	3	3	2	4	2	3	2	2	3	3	2	1	2	2
m89384150005	32	1	0	4	3	9	12	58	12	7	8	3	3	2	1	2	1	1	1	2	3	1	3	1	1	1	1	0	1	0	0	0	0	0	1	1	3	3	4	3	3	3	2	3	3	3	4	2	2
m89784020654	48	1	1	4	5	13	12	51	12	5	6	5	3	3	1	5	1	1	1	4	4	0	2	0	1	1	1	0	1	1	0	0	0	0	0	1	1	2	4	4	1	1	3	4	4	2	2	3	2
m89784844516	45	1	1	4	2	8	9	66	7	4	6	4	4	2	1	2	1	1	1	4	5	1	4	0	0	0	1	0	1	1	1	0	0	0	0	1	3	1	3	4	2	1	2	4	5	1	1	2	2
m8936454654	58	1	1	5	4	12	12	42	12	6	5	3	4	2	1	2	1	1	1	4	4	1	4	0	0	1	1	0	1	1	0	0	0	0	0	3	2	2	4	4	2	1	3	2	3	3	4	3	2
m89789001867	43	1	1	5	5	15	7	84	12	6	6	5	3	3	1	4	1	1	1	5	2	1	5	1	1	1	1	1	1	1	0	1	0	0	0	1	5	3	4	4	5	2	3	3	3	3	4	3	1
m899730486	62	1	0	5	5	15	11	36	11	8	9	5	5	5	1	5	1	1	0	4	4	0	2	0	0	1	1	1	1	1	0	0	0	0	0	1	1	1	4	4	1	1	5	2	2	2	4	1	2
m8993225	44	1	0	3	3	9	12	68	7	7	7	3	3	3	0	3	0	0	1	3	4	1	3	1	1	1	1	1	1	1	0	0	1	0	0	3	3	3	3	3	2	4	3	3	3	3	3	4	3
m89383933094	28	0	0	5	5	13	19	92	13	11	9	4	3	5	1	3	1	1	1	4	5	1	4	1	1	1	1	1	1	0	1	1	0	0	0	5	5	2	5	4	4	4	2	5	4	4	3	3	3
m8936115569	38	0	1	4	4	12	15	75	12	9	6	3	3	3	1	3	1	1	1	3	3	1	2	1	1	1	1	1	1	1	1	1	0	0	0	3	3	5	4	4	3	3	3	3	3	3	2	2	3
m8931953473	46	1	0	2	2	13	16	91	13	10	10	4	2	4	1	4	1	1	1	4	2	1	2	1	1	1	1	1	1	1	1	1	0	0	0	3	4	2	4	4	4	3	4	3	4	4	3	3	3
m8970109892	48	1	0	2	4	10	12	79	8	6	9	2	2	3	1	2	1	1	1	2	2	1	2	0	1	1	1	1	1	0	0	1	0	0	0	2	3	2	2	3	4	3	4	3	1	4	3	3	3
m8995132543	52	1	0	4	3	9	8	63	9	9	7	3	3	3	1	2	1	0	0	4	4	0	3	0	0	0	0	1	1	1	0	0	1	1	0	1	1	1	4	4	2	1	2	3	4	4	3	4	3
m899852724	59	1	0	4	3	10	12	80	11	8	10	4	3	3	1	3	1	1	1	3	2	1	3	0	1	1	1	1	0	1	0	0	1	1	0	4	3	3	2	3	3	4	3	4	3	2	3	3	4
m89783849934	42	0	1	1	2	13	10	48	14	5	8	3	4	4	0	4	0	0	0	4	5	0	2	0	0	0	0	1	1	1	0	0	0	0	0	3	2	4	4	5	3	3	5	2	2	1	4	1	2
m89384252666	56	1	1	5	5	11	17	29	14	7	6	5	4	5	0	5	0	0	0	4	4	0	2	0	0	1	0	1	1	1	0	0	1	0	0	5	1	2	4	4	2	2	4	3	1	2	4	3	2
m8931085997	37	1	1	4	4	12	15	35	13	6	4	4	4	2	1	2	1	0	0	3	2	0	2	0	0	0	1	1	1	0	0	0	0	0	1	3	3	5	4	4	4	1	2	4	5	3	2	3	2
m8993010110	50	1	0	5	4	15	19	40	14	4	4	4	4	2	1	5	1	1	1	4	5	1	4	1	1	1	1	0	1	1	0	1	1	0	1	1	3	1	4	5	3	2	4	4	4	4	2	3	2
m89785894129	35	0	0	3	1	8	9	74	7	8	8	3	3	3	0	2	0	0	0	2	2	0	3	0	1	1	1	1	1	0	0	0	0	1	0	4	2	2	3	2	4	3	3	2	2	3	2	2	3
m8970952091	40	0	0	5	4	12	15	60	12	3	7	4	5	2	1	2	1	0	1	4	2	0	1	0	0	0	1	1	1	1	0	0	0	0	0	3	2	3	4	4	4	2	4	5	4	4	5	1	1
m899806520	51	1	1	4	4	9	12	52	9	12	12	3	3	3	1	3	1	0	0	3	4	0	3	0	0	0	0	0	0	0	0	0	0	0	1	1	1	1	3	3	1	1	3	2	2	2	4	1	1
m8935957649	49	0	1	5	5	15	21	94	15	6	4	5	1	1	1	1	1	0	0	3	1	0	2	0	1	1	0	1	1	1	0	0	0	0	0	1	4	4	4	5	5	5	4	5	5	5	1	2	1
m8932465066	36	0	1	5	5	15	21	35	14	6	3	5	3	3	1	5	1	0	1	2	4	0	3	0	0	0	1	0	1	0	0	0	0	0	1	1	1	3	4	5	3	1	5	5	5	3	5	1	1
m89789083381	60	1	0	5	3	11	11	40	15	9	6	4	3	2	0	3	0	0	0	4	4	1	4	1	1	0	0	1	0	1	0	0	1	1	0	1	1	3	5	5	2	3	5	1	1	1	1	4	2
m89785741425	61	1	1	4	3	12	10	56	11	8	8	3	3	3	0	3	0	0	0	3	4	0	2	0	0	0	0	1	1	1	0	0	0	0	0	1	2	2	4	4	3	1	3	2	2	2	1	1	1
m8998663026	54	0	1	4	2	12	10	62	10	9	9	2	2	2	0	2	0	0	0	2	2	0	2	0	0	0	0	0	0	1	0	0	1	0	0	1	2	5	3	3	3	2	5	3	2	2	2	1	1
m89787986790	22	0	1	3	3	12	13	57	10	7	6	3	2	2	0	2	0	1	1	3	2	0	3	1	0	1	0	0	0	0	0	0	1	0	0	2	1	1	4	3	1	2	3	3	3	3	2	2	3
m89884921067	58	1	1	3	3	8	10	69	9	7	7	2	2	2	1	2	0	1	1	3	3	1	2	0	0	1	1	1	0	1	0	0	1	0	0	2	3	2	3	1	2	2	3	2	3	3	3	3	2
m89788427568	36	0	1	1	2	7	7	62	5	7	7	2	2	4	0	2	1	1	1	2	3	1	1	0	0	0	1	1	1	0	0	0	1	0	0	2	2	2	3	3	3	2	2	3	3	3	2	2	2
m8978932199	42	1	0	5	4	12	15	34	12	5	6	5	3	3	1	3	1	0	0	4	5	0	2	0	0	0	0	1	1	1	0	1	0	0	0	3	3	2	4	4	2	1	4	3	2	1	1	1	3
m89788140501	33	1	1	4	5	14	19	40	12	9	8	4	5	5	1	5	1	1	1	1	4	0	3	0	0	1	1	0	1	1	0	0	0	0	0	1	1	3	4	4	2	3	5	3	2	2	4	3	2
m89389563774	28	1	1	5	5	5	3	78	11	12	12	5	5	4	1	3	1	0	0	3	4	1	3	1	1	1	1	1	1	0	0	0	0	0	1	3	1	2	5	5	4	2	4	2	3	2	4	2	2
m899212623	42	0	1	5	5	12	12	64	11	8	8	4	4	3	1	4	1	1	1	4	4	1	3	1	1	1	1	1	1	1	0	0	0	0	1	3	2	3	2	4	3	3	3	3	4	4	5	2	2
m8995305864	43	1	1	3	3	9	6	49	11	12	11	3	3	3	1	3	1	1	1	4	4	0	2	0	0	0	0	0	1	0	0	0	0	0	1	1	2	2	3	5	3	3	5	2	2	3	4	1	1
m8930797435	48	1	0	3	1	10	10	74	6	8	9	3	3	3	0	2	1	1	1	2	4	1	2	0	1	1	1	0	1	0	0	1	0	0	0	2	3	3	3	2	2	3	3	2	4	3	3	3	3
m8937251423	47	1	0	4	4	12	12	36	12	8	7	4	5	3	1	3	1	0	0	3	4	0	1	0	0	1	1	0	1	1	0	0	0	0	0	1	3	1	4	4	2	1	4	3	3	2	2	3	1
m8931566402	24	0	1	5	2	10	10	49	13	12	10	3	1	2	1	1	1	0	0	3	4	0	1	0	0	1	0	1	1	0	0	0	0	0	1	3	1	3	5	5	2	2	5	4	1	1	4	1	1
m89784144083	59	1	0	4	4	11	10	64	6	7	3	3	3	2	1	2	1	0	0	2	2	1	4	0	1	1	1	1	1	1	0	0	0	0	0	2	2	3	2	3	2	3	3	2	2	2	3	2	2
m89385467263	28	0	0	5	5	13	19	95	13	3	6	4	2	4	1	5	1	1	1	5	4	1	4	1	1	1	1	1	1	1	1	1	0	0	0	5	5	5	5	5	5	3	4	5	5	4	3	3	3
m89784243310	42	1	1	1	1	15	13	46	14	12	5	5	5	5	0	5	0	0	0	5	4	0	1	0	0	1	0	1	1	1	0	0	1	0	0	5	3	3	4	5	3	1	1	1	3	3	2	1	3
m8931540652	43	0	1	2	2	8	12	91	12	9	6	4	4	3	1	3	1	1	1	4	4	0	4	1	1	1	1	1	1	1	1	1	0	0	0	3	2	3	4	5	2	3	4	2	2	3	1	2	2
m899422419	59	0	1	5	5	15	12	39	15	9	9	4	4	3	0	4	0	0	0	4	3	0	2	0	0	0	0	1	1	1	0	0	0	0	0	2	2	4	4	4	3	2	4	2	2	2	2	1	1
m89788580441	41	0	1	4	4	11	14	41	13	10	7	5	3	5	1	5	1	0	1	4	3	0	2	0	0	1	0	0	1	1	0	1	0	0	0	1	3	4	4	5	3	3	4	3	2	2	3	2	2
m89786524212	47	0	1	4	3	9	9	64	10	9	9	4	3	3	1	3	1	1	1	3	2	1	3	1	0	1	0	1	1	0	0	0	0	0	1	1	1	3	3	4	3	1	4	3	2	3	4	3	1
m89786218608	63	1	1	3	3	10	12	69	11	5	5	3	3	2	0	2	1	0	1	3	1	0	2	0	0	0	1	1	1	1	0	0	0	0	0	1	1	1	3	4	3	1	3	1	2	2	1	1	1
m8937855129	37	0	1	4	4	6	12	62	12	10	10	2	2	2	1	2	1	0	1	2	5	0	4	1	1	0	1	1	1	0	0	0	0	0	1	1	1	2	4	4	2	2	4	4	4	4	2	2	1
m8971200118	55	1	1	4	4	9	11	47	12	6	6	4	3	4	1	3	1	0	0	4	4	0	2	0	0	1	0	1	1	1	0	1	1	0	0	1	3	1	4	4	2	1	3	2	1	1	3	2	2
m89787851855	36	0	1	4	4	9	11	52	11	8	8	4	3	4	0	4	0	0	0	4	4	0	2	0	0	0	0	1	1	1	0	0	0	0	0	1	1	5	4	4	3	2	5	3	1	1	1	1	1
m89786391058	33	0	0	1	1	10	17	57	15	8	6	4	4	3	1	3	1	1	1	4	4	0	3	1	1	0	1	1	1	1	1	1	1	0	0	1	1	2	4	4	2	2	4	3	3	3	3	2	2
m89784909130	55	1	1	5	4	15	20	29	15	6	5	4	3	3	1	4	1	0	0	3	3	1	4	0	0	1	1	0	1	1	0	0	0	0	0	1	2	1	2	3	2	2	3	4	4	4	2	4	3
m89384891475	29	0	0	5	4	15	19	80	13	3	5	4	1	4	1	4	1	1	1	4	4	1	4	1	1	1	1	1	1	1	1	1	0	0	0	5	5	3	5	4	5	4	5	5	4	4	4	3	3
m8932127278	25	1	1	3	3	9	9	91	9	7	8	3	3	3	1	3	1	1	1	3	3	1	2	1	1	1	1	1	1	0	0	0	0	0	1	3	3	3	3	3	3	1	3	3	3	3	2	2	1
m8931764276	56	1	1	4	4	12	10	42	12	6	6	3	4	3	1	3	1	1	0	4	2	1	4	0	0	1	1	0	1	1	0	0	0	0	0	1	1	3	4	4	2	2	4	1	3	1	4	2	2
m8993932064	41	1	1	4	4	12	13	39	10	8	8	4	4	4	1	4	1	0	1	3	2	0	2	0	0	1	1	1	1	1	0	0	1	0	0	1	1	3	4	3	1	2	4	3	3	3	4	2	2
m8934779892	27	1	1	5	4	13	16	34	11	8	6	4	2	3	1	2	1	0	1	4	4	0	3	0	1	0	1	1	1	0	0	0	0	0	1	3	3	2	4	4	3	1	4	4	3	4	4	2	2
m89386741766	42	1	0	4	4	13	12	54	14	6	3	4	2	3	1	3	1	1	1	2	4	1	4	0	0	0	1	1	1	0	0	0	0	0	1	1	2	4	2	2	2	2	3	5	4	4	2	2	2
m8998340169	45	1	0	5	4	11	16	66	11	4	4	4	4	2	1	2	1	1	1	2	2	1	2	1	0	1	1	1	1	1	0	1	1	0	0	2	3	1	4	3	1	1	2	3	4	5	3	3	2
m8931188866	44	1	1	1	1	3	3	57	3	3	9	1	2	2	1	1	1	1	1	1	1	1	1	1	1	1	1	1	1	1	0	0	0	0	0	1	1	1	1	1	2	2	2	2	1	2	2	2	2
m8971000068	21	1	0	1	5	15	18	60	15	5	5	5	1	5	1	2	1	1	1	5	5	1	5	1	1	1	1	1	1	1	1	1	0	0	1	5	5	5	5	5	5	5	5	5	5	5	5	5	5
m899562900	63	1	1	4	1	9	9	78	12	7	7	3	3	3	1	2	1	0	1	1	2	1	4	0	0	1	0	0	1	1	0	0	0	0	0	1	1	2	4	3	3	1	3	3	3	1	3	2	2
m89386977596	42	1	0	5	5	13	12	38	14	9	7	2	4	2	1	5	1	1	1	4	4	1	4	0	0	1	1	1	1	1	1	1	0	0	0	2	3	2	4	5	3	2	5	2	2	2	4	4	1
m89786635561	51	1	0	5	4	14	12	50	12	3	3	5	2	3	1	4	1	1	1	4	4	1	4	0	1	0	1	1	1	1	0	0	0	1	0	1	1	2	2	2	1	1	1	4	4	4	2	5	5
m8970118658	37	1	0	4	4	13	15	42	12	7	6	5	3	3	1	3	1	1	1	4	3	0	2	1	1	1	1	1	1	1	1	0	1	0	0	1	1	3	4	5	2	2	5	2	2	2	2	2	2
m8971896022	53	1	1	4	4	9	9	74	10	7	6	5	3	3	1	3	1	0	1	5	4	0	2	0	0	1	0	0	1	0	0	0	0	0	1	1	2	2	4	5	2	1	4	4	3	3	4	2	2
m8932576042	44	1	0	1	1	3	3	38	3	3	4	2	3	2	0	2	0	0	1	1	1	1	1	1	1	1	1	1	1	0	1	0	0	0	0	1	1	2	1	1	1	2	2	2	2	2	2	2	2
m8976805059	41	0	1	2	4	12	15	46	10	4	3	4	4	3	1	3	1	0	0	3	3	0	3	0	0	0	1	1	1	0	0	1	0	0	0	2	2	5	3	3	2	1	4	3	3	3	1	1	1
m8971155876	28	1	1	4	4	10	13	75	7	8	9	4	3	3	1	2	0	1	1	3	3	1	2	1	1	0	1	0	1	0	0	0	0	1	0	2	1	3	4	3	2	2	3	2	3	3	3	2	3
m8935272649	61	1	1	4	4	10	10	37	10	11	8	4	5	5	1	2	1	1	0	3	4	0	2	0	0	0	1	0	1	1	0	0	0	1	0	1	1	1	4	5	1	1	5	3	1	1	1	1	1
m8932940277	40	1	1	5	4	9	12	44	12	8	9	4	4	3	1	2	1	1	1	3	4	1	4	1	0	0	0	1	0	0	0	0	0	0	1	2	2	1	4	5	2	1	4	2	1	1	4	1	1
m899427597	60	1	1	5	3	11	12	40	12	7	6	3	3	2	1	3	1	0	0	4	4	0	4	1	0	0	0	1	1	1	0	0	0	0	1	2	4	3	4	5	3	2	3	3	3	3	4	1	1
m89787980054	46	1	1	4	4	11	13	69	11	4	7	4	2	3	0	2	0	0	0	2	2	0	1	0	0	0	0	0	1	0	0	0	0	0	1	3	2	2	2	3	2	2	2	3	4	4	1	1	2
m89787052634	47	1	0	3	1	8	14	74	9	8	8	2	4	3	1	4	0	1	1	5	3	1	4	0	1	1	0	0	1	1	1	1	1	0	0	2	1	4	3	2	2	2	4	5	2	1	2	3	4
m8936823463	42	1	1	4	5	12	13	37	10	8	7	4	4	4	1	3	1	1	1	2	4	0	2	1	1	0	1	1	1	1	0	0	1	0	0	1	1	2	4	3	1	2	2	3	3	2	4	2	2
m89789083639	31	0	1	3	3	10	10	59	12	5	5	3	3	3	0	4	0	0	0	2	2	0	2	0	1	0	0	1	0	1	1	0	0	0	0	3	3	4	2	2	3	4	4	3	2	2	1	2	2
m89689444131	56	0	1	2	3	10	12	72	8	5	5	3	2	3	0	3	0	1	1	3	4	1	2	1	1	1	1	1	1	0	0	1	0	1	0	2	2	2	3	2	3	3	2	2	2	2	4	3	3
m89388237761	28	1	1	5	4	6	6	77	12	8	6	5	4	5	1	2	1	1	1	4	4	1	4	0	0	1	0	1	0	0	0	0	0	0	1	1	1	1	4	5	4	1	5	3	2	1	4	3	2
m89788055455	48	1	1	4	5	9	12	50	12	7	7	5	5	2	1	3	1	0	0	3	1	0	1	0	0	0	1	1	1	1	0	0	0	0	0	1	1	1	5	4	1	1	1	5	1	1	1	1	2
m89385552982	36	1	1	4	5	12	12	36	12	9	7	4	4	2	1	4	1	1	1	1	4	1	3	0	1	1	1	1	1	1	0	1	0	0	0	4	3	3	4	4	2	2	4	2	2	3	1	2	2
m89387953177	44	1	0	4	4	9	12	42	13	9	9	4	4	3	1	4	1	1	1	4	4	0	2	0	0	1	1	1	1	1	1	1	0	0	0	1	1	2	4	4	2	2	4	3	3	3	5	1	1
m89784489419	35	0	1	5	4	12	18	59	15	7	7	3	4	1	0	5	0	0	0	5	4	0	2	0	1	0	0	1	1	1	0	0	0	0	0	1	4	3	4	5	4	5	1	4	4	5	2	1	2
m8994490224	36	1	1	4	4	9	14	75	8	7	8	3	2	3	1	3	1	1	1	4	2	1	4	1	1	1	1	0	1	0	0	0	0	0	1	4	4	4	4	4	4	3	4	4	4	3	1	2	3
m89385290689	62	1	0	4	4	11	15	38	12	7	6	3	3	3	1	2	1	0	1	3	2	0	2	0	0	0	0	0	0	1	0	0	0	0	0	2	1	2	3	3	2	1	2	4	4	4	3	2	2
m8998637622	59	0	1	4	4	9	12	56	14	7	7	5	3	5	1	2	1	1	1	2	4	0	1	0	0	0	0	1	1	0	0	0	0	0	1	1	1	2	5	5	1	1	5	1	1	1	4	1	2
m8970995012	52	1	0	4	4	12	14	35	15	7	5	4	5	4	1	3	1	1	1	4	4	0	2	0	0	1	1	1	1	1	0	0	0	1	0	1	1	3	4	5	2	2	5	1	2	1	5	5	2
m89384777974	33	1	1	4	4	10	12	48	13	3	6	4	4	5	1	2	1	1	1	3	3	0	1	0	0	1	1	0	1	1	1	0	0	0	0	1	4	2	2	4	5	2	5	3	5	1	1	2	2
m8994168068	34	0	1	2	3	11	12	68	11	5	8	1	4	4	0	3	0	0	1	3	4	0	1	0	0	1	0	1	1	1	0	0	0	0	0	3	2	4	4	4	3	3	4	3	3	2	1	2	1
m89787542731	51	1	1	1	2	10	12	35	9	5	8	3	3	2	1	3	1	1	1	3	3	0	2	0	0	0	1	1	1	1	0	1	0	0	0	4	4	4	4	4	4	3	3	3	3	5	5	1	1
m89786223651	49	1	0	4	2	11	16	45	12	6	6	4	4	2	0	3	0	0	0	3	4	0	1	0	0	0	0	1	1	1	0	0	1	0	0	3	4	2	3	3	3	3	3	4	4	5	2	2	2
m89784089742	29	0	1	5	5	7	3	49	11	12	12	3	3	1	0	1	0	0	0	3	3	0	3	0	0	0	0	1	1	1	0	0	0	0	0	1	1	5	1	5	1	3	5	1	3	1	1	1	1
m8995183610	42	0	1	5	4	15	17	55	13	7	5	5	5	3	1	3	1	0	1	3	3	0	2	0	0	0	0	1	1	0	0	0	0	0	1	1	3	3	4	4	2	2	4	2	2	2	1	1	1
m89788734423	41	1	1	5	4	10	12	38	13	6	6	4	5	3	1	2	1	1	1	3	5	1	4	0	0	1	1	0	1	1	1	0	0	0	0	1	1	3	5	4	1	2	2	2	2	1	1	2	2
m89988776407	45	1	1	5	3	8	3	61	11	8	9	3	3	3	0	3	1	0	0	3	3	1	3	0	0	0	0	1	1	1	0	1	1	0	0	4	2	4	5	4	3	2	5	1	1	1	4	2	2
m8970942643	60	1	1	5	4	14	10	39	14	10	9	3	4	4	1	2	1	1	1	4	4	1	3	0	0	0	0	1	0	1	0	0	0	1	0	1	1	2	2	5	1	1	5	1	1	1	3	2	3
m89788962152	44	0	1	4	3	10	4	58	11	10	10	3	3	3	1	1	1	0	0	2	3	0	2	0	0	0	0	0	0	0	0	0	0	0	1	1	1	1	4	5	2	1	4	1	1	1	2	2	2
m8938206805	58	1	1	2	2	6	9	65	12	6	9	2	3	2	1	2	1	1	1	2	2	0	3	1	1	0	1	1	1	0	0	0	1	0	0	2	2	2	2	2	2	2	2	2	2	3	2	2	2
m89786264570	34	1	0	2	2	6	9	90	9	8	6	2	2	2	1	2	1	0	1	2	4	0	2	0	0	1	0	0	0	0	0	0	0	1	0	2	3	3	2	2	3	2	2	4	3	1	1	3	2
m8972149320	61	1	0	4	4	9	11	68	14	10	6	3	5	3	1	4	1	1	0	4	4	0	1	0	0	0	1	1	0	0	0	0	0	0	1	1	3	5	5	5	5	5	3	5	5	5	3	1	2
m8932854741	65	1	0	3	4	10	13	66	11	6	5	3	3	3	1	3	1	1	1	3	3	1	2	0	1	1	1	1	0	0	0	0	0	0	1	3	2	3	2	3	3	3	3	3	2	2	3	4	3
m89785029010	37	1	1	4	4	10	15	37	10	8	10	3	3	4	1	4	1	1	1	3	4	1	4	0	0	0	1	1	1	1	0	0	0	0	0	2	2	1	4	4	3	1	3	2	2	2	1	2	2
m8994810599	62	1	0	3	4	11	14	41	15	10	5	4	4	4	0	2	0	0	0	2	4	0	1	0	0	0	0	1	1	1	0	0	0	0	0	1	1	1	5	5	1	1	5	2	2	3	1	2	2
m8935146402	44	1	1	5	5	15	11	35	14	8	9	2	5	2	1	2	1	0	0	4	4	1	3	0	0	1	1	0	1	1	0	1	1	0	0	1	2	1	5	5	1	1	5	2	1	1	4	1	1
m8972710984	54	1	0	4	4	11	12	91	14	7	6	4	3	3	1	3	1	0	0	3	4	1	2	0	0	0	1	1	1	1	0	0	1	0	0	3	2	2	4	5	3	2	4	3	3	2	1	2	2
m89384445714	62	1	1	5	5	11	12	44	12	10	7	5	5	3	1	4	1	1	1	4	4	0	1	0	0	1	1	1	1	1	0	0	0	0	0	1	2	2	5	5	3	2	4	3	3	1	3	4	2
m89785063856	35	0	1	5	4	3	5	46	11	8	11	3	4	4	0	4	0	0	0	3	1	0	2	1	1	0	0	1	1	1	1	1	0	0	0	1	3	5	4	2	4	2	1	3	3	1	4	2	1
m8974321507	37	0	1	5	4	11	9	44	12	9	7	5	2	2	1	5	1	0	1	4	4	0	2	0	1	1	1	0	1	1	0	1	0	0	0	4	2	4	4	4	3	3	4	4	3	3	3	2	1
m89787707353	24	0	0	3	3	9	12	77	10	6	6	3	4	3	0	3	0	1	1	4	4	1	3	1	1	0	0	1	1	0	0	0	0	1	0	5	1	1	3	3	4	4	4	2	3	2	3	3	4
m89788026804	41	0	1	3	3	6	9	37	11	10	12	3	3	3	0	3	0	0	0	4	3	0	1	0	0	1	0	0	0	0	0	0	0	0	1	1	1	1	3	3	3	1	3	3	3	3	1	3	2
m8932841859	35	0	1	5	4	12	9	51	12	9	7	5	4	2	1	4	1	0	1	4	4	1	2	0	1	1	1	0	1	1	0	1	0	0	0	3	2	4	4	4	2	3	4	4	3	3	3	2	1
m89786438895	43	0	1	1	3	9	13	65	7	8	8	5	5	3	0	3	0	0	0	3	4	0	3	1	0	0	1	1	1	1	0	0	0	0	0	2	2	4	5	4	3	2	5	3	3	3	1	2	2
m89789301445	40	0	1	5	4	13	14	36	14	8	7	4	3	3	1	3	1	0	0	3	4	1	2	0	0	0	1	1	1	0	0	0	0	0	1	1	1	3	5	5	1	2	4	2	2	2	2	1	3
m8936667849	52	0	1	5	5	13	16	54	11	9	9	4	3	3	1	3	1	1	1	4	4	0	3	1	1	1	1	1	1	1	0	0	0	0	0	2	2	5	2	4	2	2	4	3	2	2	2	2	1
m8998334593	48	0	1	4	3	9	3	41	9	5	10	2	2	3	1	3	1	0	0	1	1	0	4	0	0	0	1	0	0	0	0	0	0	0	1	1	1	3	1	1	4	3	1	1	1	1	5	1	1
m8934279493	31	0	1	4	4	12	12	46	12	8	9	4	3	3	1	3	1	0	0	3	4	1	3	0	0	0	1	1	1	0	0	0	0	0	1	1	1	1	3	3	2	2	4	1	1	1	3	2	2
m8988236961	34	0	1	4	5	13	15	83	11	9	10	2	2	2	0	1	1	1	1	3	2	1	2	1	1	1	1	1	1	1	0	1	0	0	0	4	4	2	5	3	3	4	3	4	5	4	3	3	2
m89986724558	46	0	1	4	5	11	14	39	10	6	8	5	4	3	1	5	1	0	1	3	2	0	2	1	1	0	1	1	1	1	0	0	1	0	0	1	1	4	4	2	2	3	4	2	2	3	3	3	3
m8934659467	33	0	1	4	4	13	12	78	13	9	9	4	3	3	1	2	1	1	1	3	3	1	3	1	1	1	1	1	1	1	1	1	1	0	0	4	4	4	4	3	3	3	3	4	4	4	4	3	3
m89386577053	30	0	0	5	4	11	17	76	8	6	7	2	2	1	0	2	0	1	1	1	2	0	1	1	1	1	1	1	1	0	0	1	0	0	0	2	2	3	2	2	2	2	4	2	3	4	4	3	3
m8965188881	46	0	1	4	5	13	14	35	11	7	7	5	2	5	1	4	1	0	1	3	4	1	4	1	1	0	1	1	1	1	0	0	0	0	0	1	1	4	4	2	2	3	2	3	2	3	4	3	2
m8996464927	40	0	0	4	3	10	7	50	14	7	6	2	5	5	1	2	1	0	1	3	4	0	3	0	0	0	1	0	1	1	1	0	0	0	0	1	3	4	4	2	3	3	1	2	2	1	5	1	1
m8973837312	35	0	1	4	2	9	12	102	14	8	8	3	2	3	0	5	0	0	0	3	3	0	2	0	0	0	0	1	1	0	1	1	0	0	1	1	1	5	2	4	5	5	5	1	1	1	4	3	2
m89784986665	43	0	1	4	4	12	10	44	11	10	9	4	4	2	0	2	1	1	0	3	5	0	2	0	0	0	0	1	0	1	0	1	0	0	0	2	3	3	4	3	2	2	4	4	2	1	3	1	1
m899310630	58	0	0	4	4	12	11	43	10	7	10	4	2	3	1	3	0	0	0	3	4	0	1	0	0	0	1	1	1	1	0	0	0	0	0	1	1	1	3	4	2	1	5	2	2	1	1	1	2
m89385206543	38	0	1	5	5	13	18	42	15	10	10	3	4	3	1	4	1	1	1	4	2	0	4	0	0	1	1	1	1	0	0	0	0	0	1	3	3	5	4	4	3	2	3	3	4	3	4	1	2
m89385476739	39	0	0	5	5	15	18	87	9	6	9	3	2	3	0	3	0	1	1	1	2	1	3	1	1	1	1	1	1	0	0	0	1	0	0	1	1	2	2	2	3	3	2	3	3	3	3	3	3
m89784370029	40	0	1	5	5	9	7	91	13	11	9	4	5	3	0	3	0	0	1	3	3	0	3	0	0	0	0	1	1	1	0	1	0	0	0	4	3	3	3	4	3	3	1	1	1	1	4	1	1
m89789575521	46	0	1	4	2	10	13	54	12	7	7	1	4	5	0	4	0	0	0	2	2	0	1	0	0	0	0	1	1	1	0	1	0	0	1	3	3	5	4	2	3	4	5	3	4	3	1	1	2
m8932071848	26	0	1	3	2	9	3	40	10	10	9	3	3	3	1	3	1	0	0	3	3	0	2	0	0	0	1	0	0	0	0	0	0	0	1	3	4	5	4	2	3	1	3	3	2	2	3	4	2
m89788486707	45	0	1	2	2	10	13	67	13	8	6	3	3	3	0	2	0	1	0	1	4	0	4	1	1	0	0	1	0	1	0	1	1	1	0	3	4	2	3	2	2	3	4	5	3	4	4	4	5
m8931997257	55	0	1	4	4	10	16	54	10	7	7	3	4	3	1	3	1	1	1	2	4	1	3	1	1	0	1	1	0	0	0	0	0	1	0	3	3	3	3	3	2	3	3	2	3	3	4	3	2
m89783899104	52	0	1	4	4	8	14	96	11	7	9	3	2	4	1	3	0	0	0	3	2	0	1	0	0	0	1	1	1	1	0	0	0	0	0	2	2	5	2	4	3	2	5	3	3	1	3	2	2
m8932663031	32	0	1	5	3	13	10	45	11	12	11	5	5	3	1	4	1	0	0	4	4	1	3	0	0	0	1	0	0	0	0	0	0	0	1	1	1	1	4	5	1	1	5	3	1	1	4	3	1
m8935487478	36	0	0	5	5	15	3	35	15	8	10	5	5	5	0	5	0	0	0	5	5	0	2	0	0	0	0	1	1	1	0	0	0	0	0	1	1	5	5	5	5	5	5	1	1	2	5	1	1
m8971087207	43	0	1	1	2	9	9	59	13	9	4	3	4	4	1	2	1	1	1	5	4	1	3	0	0	0	0	1	1	0	0	0	0	0	1	1	2	2	4	4	3	2	5	3	1	1	4	2	2
m8970319152	45	0	1	4	4	13	16	41	12	5	8	4	4	4	1	4	1	1	0	4	4	0	2	0	0	0	0	0	1	0	0	1	0	0	0	5	5	4	2	4	2	2	2	3	3	2	2	1	1
m8998602895	51	0	1	5	5	15	18	40	14	7	5	5	5	3	1	2	1	1	1	5	5	1	4	1	0	0	1	1	1	1	0	1	0	0	0	1	2	2	4	4	2	2	5	5	5	5	2	1	1
m89786395409	27	0	1	4	4	11	13	50	14	8	6	5	2	3	1	3	1	1	1	4	4	1	2	0	0	0	1	1	1	1	0	0	0	0	0	2	2	3	4	4	2	3	4	3	2	2	2	2	2
m8934775816	44	0	1	5	4	12	13	67	11	12	11	5	1	5	0	3	1	0	0	4	4	0	4	0	0	0	0	1	1	1	0	0	0	0	0	1	1	3	5	4	3	2	4	2	1	2	3	1	1
m8990309622	52	0	1	3	3	12	12	69	7	8	9	3	3	4	0	3	1	1	1	4	4	1	4	1	1	1	1	1	1	1	0	0	1	0	0	2	3	5	3	3	4	3	2	2	2	3	3	3	2
m8932736096	35	0	1	4	4	12	17	97	12	11	12	4	3	3	1	2	1	1	1	1	2	1	4	1	1	1	1	1	1	0	1	1	0	0	1	3	4	4	4	4	4	4	4	4	4	4	4	4	4
m89387912438	32	0	1	4	4	12	15	58	12	6	9	3	3	3	1	3	1	1	1	4	4	1	3	1	1	1	1	1	1	1	0	1	0	0	0	4	2	3	3	3	2	2	3	3	3	3	2	2	2
m8932855182	38	0	0	2	3	7	12	69	8	6	8	2	4	3	0	2	0	0	1	2	3	1	2	0	1	0	1	1	1	0	0	1	1	0	0	2	2	2	3	3	2	3	3	2	2	4	3	3	2
m8932843857	48	0	1	2	3	8	11	76	8	7	9	3	3	3	0	3	0	0	0	3	3	0	2	1	1	1	1	1	1	0	0	0	1	0	0	2	3	3	2	3	3	3	2	2	3	3	2	2	3
m89784011084	35	0	1	3	3	13	13	33	11	7	6	4	5	4	0	5	0	0	0	4	4	1	3	0	1	0	0	1	1	0	1	0	0	0	1	2	2	3	4	3	2	3	2	2	4	2	1	2	2
m89386231065	36	0	1	5	5	3	21	78	10	8	8	3	1	2	1	1	1	1	1	2	2	0	2	0	0	0	0	0	0	0	0	0	0	0	1	3	2	2	2	2	2	3	2	3	1	3	3	2	3
m8932831753	44	0	1	5	5	15	21	105	15	5	3	3	1	3	0	3	1	1	1	2	3	0	1	0	0	0	1	1	1	0	0	0	0	0	1	5	5	5	4	4	5	1	4	3	3	3	4	1	1
m8931629309	36	0	0	1	1	6	11	63	10	8	8	3	3	3	1	2	1	1	1	4	4	1	4	1	1	1	1	1	1	1	1	1	1	0	0	4	3	4	4	4	2	4	4	4	4	5	4	3	3
m8932221278	58	0	1	3	3	9	11	62	9	8	9	3	4	3	0	3	0	0	0	1	2	0	3	0	0	1	0	1	0	1	0	0	0	1	0	2	1	3	2	2	3	2	2	4	3	3	2	4	4
m89383647166	39	0	0	1	1	15	19	102	14	9	4	2	1	1	1	2	1	1	1	1	3	1	3	1	1	1	1	1	0	1	1	1	0	0	0	2	2	1	2	3	2	3	2	1	2	3	1	3	3
m89786862296	34	0	1	4	5	10	11	50	13	9	8	5	3	3	1	3	0	1	0	2	5	1	2	0	0	1	0	1	1	1	1	0	0	0	0	3	4	4	5	4	1	1	4	1	1	2	2	1	1
m89789162494	42	0	0	4	3	8	10	66	8	7	6	3	3	2	0	2	0	0	1	3	3	0	1	0	0	1	0	0	1	0	0	0	0	1	0	2	2	3	3	3	3	3	3	3	3	2	1	4	3
m8994797726	37	0	1	5	4	14	14	60	11	6	7	4	4	4	1	4	1	1	1	4	3	1	3	1	1	1	1	0	1	1	1	1	0	0	1	3	2	3	2	4	3	3	4	3	3	3	2	1	2
m89784118036	36	0	1	4	1	3	3	58	15	3	3	4	4	4	1	4	1	1	1	4	4	0	1	1	1	1	1	0	1	1	1	1	0	0	0	1	1	4	4	4	3	2	4	4	4	4	1	1	2
m8998958096	51	0	1	4	3	11	12	66	12	8	7	5	4	4	1	4	1	1	1	3	3	1	3	0	0	0	1	1	1	1	0	0	0	0	0	2	1	3	2	5	1	2	5	4	3	3	4	1	2
m8971040920	47	0	0	3	2	9	16	59	9	6	4	4	4	2	1	2	1	1	1	3	1	1	1	1	1	1	0	1	1	1	0	0	0	0	0	3	3	2	2	3	2	2	3	2	3	3	2	2	3
m89787054428	36	0	1	2	4	9	14	58	11	3	5	4	2	2	0	5	1	0	0	4	3	0	2	0	0	0	1	1	1	1	0	1	0	0	0	5	3	4	5	5	1	1	5	3	4	5	1	1	1
m8938688882	48	0	1	2	2	8	12	86	6	6	7	1	2	2	1	2	1	1	0	3	3	0	2	0	0	0	0	1	1	1	0	1	0	0	1	2	2	5	2	3	2	2	4	3	4	2	3	5	2
m8932194769	61	0	1	1	1	7	7	44	11	12	12	5	5	5	1	5	1	1	0	4	4	0	2	0	0	0	0	1	1	0	0	0	0	1	0	4	3	4	5	5	4	3	1	1	1	1	1	1	1
m89787027472	42	0	1	1	5	12	19	46	10	9	11	5	5	5	0	5	0	0	1	3	3	0	3	0	0	0	1	1	1	0	0	0	0	0	1	5	4	3	4	4	4	5	3	4	4	4	5	1	1
m8932854446	35	0	0	4	4	12	17	54	12	5	6	4	4	2	1	2	1	1	1	4	4	1	4	1	1	1	0	1	0	1	0	1	0	0	0	2	3	4	4	5	2	1	4	2	1	3	2	3	3
m8970918082	35	0	1	1	1	7	7	94	10	6	6	2	4	4	1	2	0	1	0	2	1	0	2	0	0	0	0	0	0	1	0	1	0	0	0	3	3	2	2	2	3	2	2	4	4	4	1	2	3
m8998425759	54	0	1	4	2	9	10	62	7	8	8	3	3	3	0	3	1	0	0	2	4	0	3	0	0	0	0	1	0	1	0	0	1	0	0	1	4	5	2	4	4	4	4	2	2	2	3	2	4
m89785911266	37	0	1	5	4	10	10	78	14	6	8	4	5	5	0	5	0	0	0	4	4	0	3	0	0	0	0	1	1	1	0	1	0	0	0	5	5	5	4	4	4	3	2	3	4	3	4	1	2
m8932057437	52	0	0	4	3	12	13	52	9	6	7	4	4	3	0	3	0	1	1	4	4	0	3	0	0	0	0	1	1	1	0	0	0	0	0	1	1	3	5	4	3	1	5	4	4	1	1	2	2
m89385376496	37	0	1	4	4	12	13	58	9	4	7	3	3	3	1	3	1	1	1	2	3	0	2	0	0	0	1	0	1	0	0	0	0	0	1	1	1	3	1	3	2	3	4	1	2	2	4	1	2
m8998579180	35	0	1	1	2	7	5	52	7	6	7	2	2	2	1	1	1	1	1	1	1	1	1	1	1	0	1	1	1	0	0	0	1	0	0	1	2	2	1	1	1	2	1	1	1	1	2	2	1
m89387680880	29	0	1	5	5	15	21	29	15	9	11	5	5	5	1	5	1	0	0	5	5	0	1	0	0	0	1	1	1	1	0	0	0	0	0	1	1	5	4	4	2	2	1	3	3	3	4	1	2
m89784459131	30	0	1	4	3	7	13	49	9	7	7	2	2	3	0	2	0	0	0	4	2	0	3	0	0	0	0	0	0	1	1	0	0	0	0	2	2	3	2	2	3	2	2	3	4	3	1	2	4
m89788744984	65	0	1	2	2	9	14	55	5	3	6	2	3	1	1	1	0	0	0	3	1	0	2	0	0	0	0	1	0	1	0	0	0	0	0	3	3	2	4	4	3	2	5	2	1	2	1	1	1
m89784880856	32	0	1	4	3	8	9	53	12	3	7	3	5	3	1	3	1	1	1	3	2	1	2	0	0	0	0	1	1	1	1	0	0	0	0	1	5	5	2	2	4	5	4	5	5	5	2	2	2
m89387309874	39	0	1	5	5	3	3	77	10	9	8	4	4	5	1	2	0	0	0	3	4	0	2	0	0	1	1	0	1	0	0	0	0	0	1	1	1	1	5	5	1	1	4	1	1	1	1	2	2
m89785907025	43	0	1	2	3	8	11	61	8	7	6	3	3	2	0	2	1	1	1	3	2	1	3	0	0	0	1	1	1	1	1	1	1	0	0	3	2	3	2	2	2	3	2	3	3	3	2	2	3
m8931946251	62	0	0	3	3	11	16	81	7	7	5	2	2	3	0	3	0	0	1	3	3	1	2	0	0	1	0	1	1	1	0	0	0	1	0	2	3	2	3	3	3	2	3	2	2	4	5	2	2
m8998370828	61	0	1	2	2	8	11	80	9	8	8	4	2	4	1	3	1	1	1	2	2	1	3	1	1	1	1	1	1	1	0	0	1	0	0	2	3	4	4	4	4	3	4	2	3	3	2	2	2
m89785895048	48	0	0	4	3	8	7	60	7	7	7	2	2	1	0	1	0	1	0	1	2	0	2	0	1	1	1	1	0	0	1	0	0	0	0	2	2	2	3	2	2	3	2	3	2	2	1	3	2
m89785460882	27	0	1	4	4	11	12	62	7	3	3	4	4	2	1	1	1	1	1	4	2	1	1	0	0	0	1	1	1	0	0	0	0	0	1	1	3	3	4	4	3	2	4	4	4	4	1	1	2
m89783608958	38	0	1	4	4	11	12	49	12	8	8	3	5	3	0	3	1	0	0	3	4	0	2	0	0	0	0	1	1	0	0	0	0	0	1	1	1	4	4	5	4	2	5	1	3	2	3	2	2
m8972211156	47	0	1	1	1	12	13	64	8	6	7	3	4	3	0	5	0	0	0	3	4	0	1	0	0	0	0	1	0	0	0	0	1	0	0	2	2	4	3	4	3	1	4	3	1	1	5	5	2
m89784664397	30	0	1	4	4	10	11	56	14	7	7	4	5	5	0	5	1	0	0	3	3	0	2	0	0	0	0	1	1	1	0	0	0	0	0	1	3	4	4	2	4	3	4	4	2	2	1	1	1
[truncated: 2 more columns]
