# Supplementary material for: The relationship between the living environment and remote working: an analysis using the SHEL model
Source: PeerJ. 2024 May 7;12:e17301. doi: 10.7717/peerj.17301 (PMC11086296; doi:10.7717/peerj.17301)
Supplement: Supplemental Information 2 [file peerj-12-17301-s002.xlsx]

## Sheet: Sheet1
	1	0
Gender	Male	Female
Job	Managerial position	Non-managerial position
Dedicated desk	Yes	No
Dedicated chair	Yes	No
Chair: armrests	Yes	No
Chair: adjustment	Yes	No
External monitor	Yes	No
External speaker	Yes	No
External microphone	Yes	No
Headset	Yes	No
Dedicated workspace	Yes	No
Workspace is within the space they use for housework and daily life	Yes	No
Space for eating and resting	Yes	No
Living with partner	Yes	No
Living with preschooler	Yes	No
Living with elementary school students	Yes	No
Living with junior high school students or older	Yes	No
Living with children who have completed their studies	Yes	No
Living with parents	Yes	No
